# Supplementary material for: New insights into high temperature hydrothermal synthesis in the preparation of visible-light active, ordered mesoporous SiO2–TiO2 composited photocatalysts
Source: Royal Society of Chemistry journal article supplement (doi:10.1039/c7ra01368j), 2017-01-01
Supplement: c7ra01368j1.pdf [file c7ra01368j1.pdf]

## **Supplementary Material**

# **New Insights Into the High Temperature Hydrothermal Synthesis in the Preparation of Visible-Light Active, Ordered Mesoporous SiO<sub>2</sub>-TiO<sub>2</sub> Compositing Photocatalysts**

Qin Wu, Chen Liu, Jinjun Peng and Fujian Liu\*

*College of Chemistry & Chemical Engineering, Shaoxing University, Shaoxing,  
312000, China.*

*\*Corresponding authors: fjliu@usx.edu.cn.*

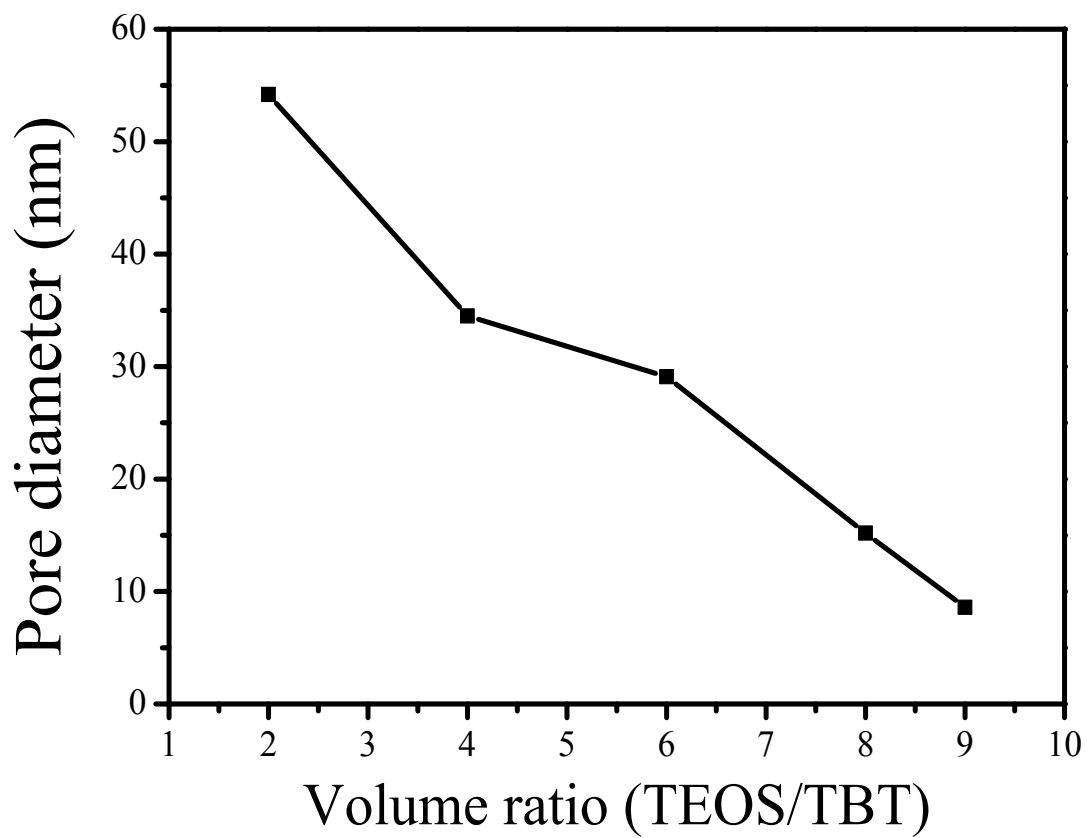

**Figure S1** Relationship of mesopore sizes and volume ratio of TEOS/TBT in F127-C-OMS@TiO<sub>2</sub>-xs.

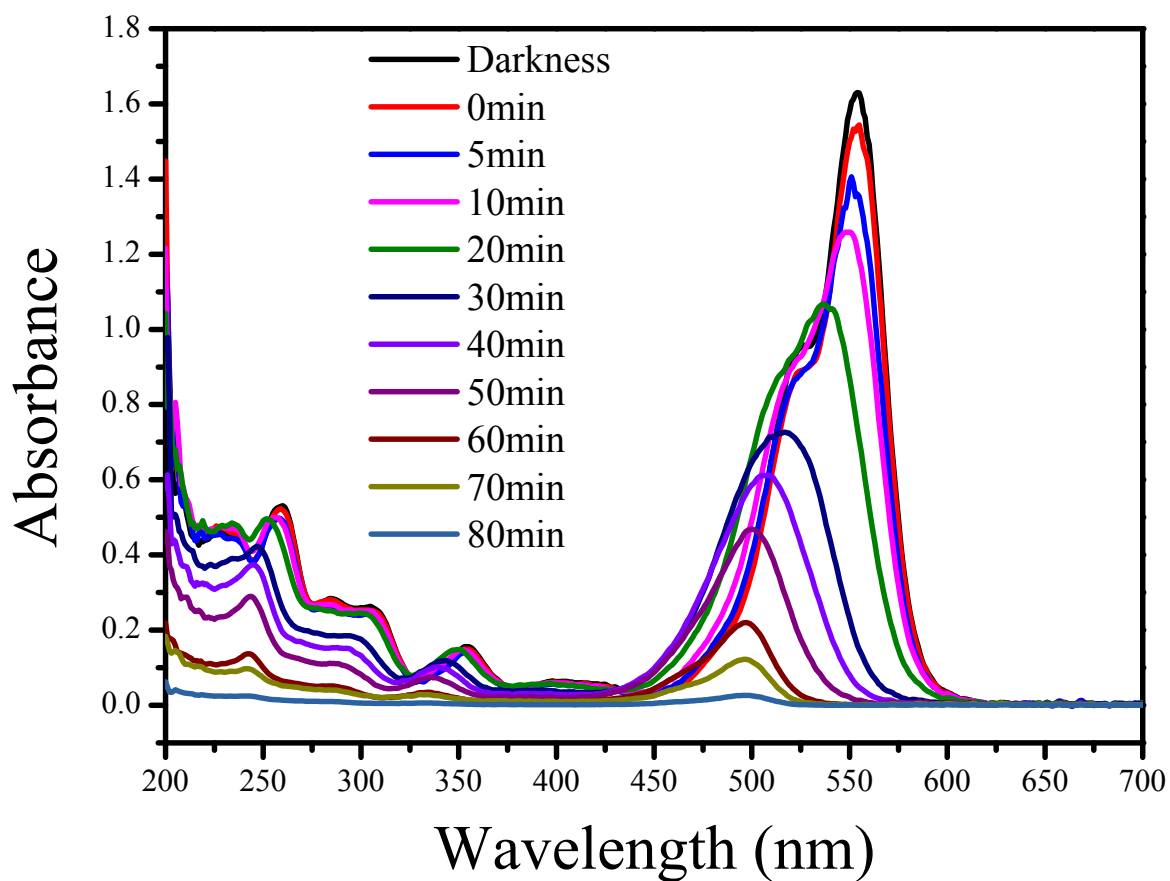

**Figure S2** UV-vis adsorption spectra of 100ppm of RhB with irradiation time over F127-C-OMS@TiO<sub>2</sub>-4.0.

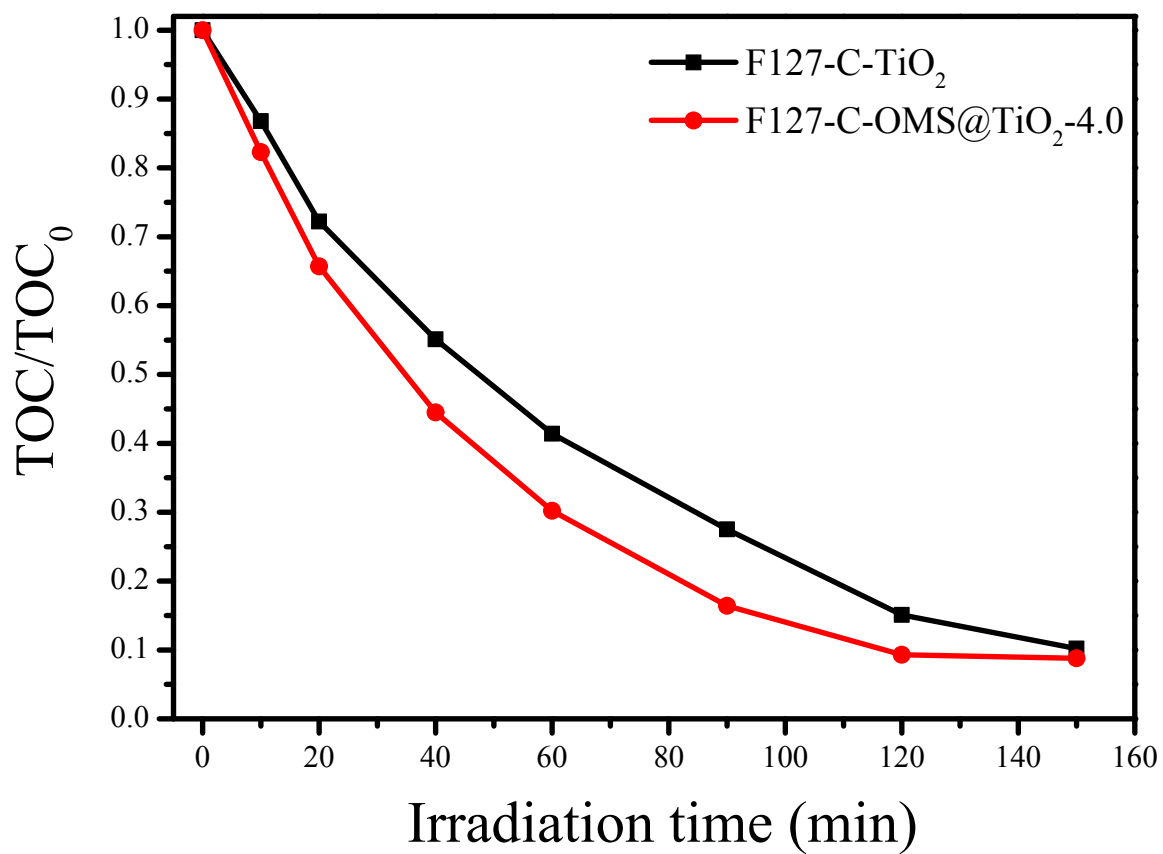

**Figure S3** Kinetics of disappearance of total organic carbon (TOC) by photocatalytic degradation over F127-C-OMS@TiO<sub>2</sub>-4.0 and F127-C-TiO<sub>2</sub>.
